# Supplementary material for: Assessment of the Impact of Humic Acids on Intestinal Microbiota, Gut Integrity, Ileum Morphometry, and Cellular Immunity of Turkey Poults Fed an Aflatoxin B1-Contaminated Diet
Source: MDPI journal article supplement (doi:10.3390/toxins16030122), 2024-02-29
Supplement: s1 [file s1]

# Assessment of the Impact of Humic Acids on Intestinal Microbiota, Gut Integrity, Ileum Morphometry, and Cellular Immunity of Turkey Poults Fed an Aflatoxin B<sub>1</sub>-Contaminated Diet

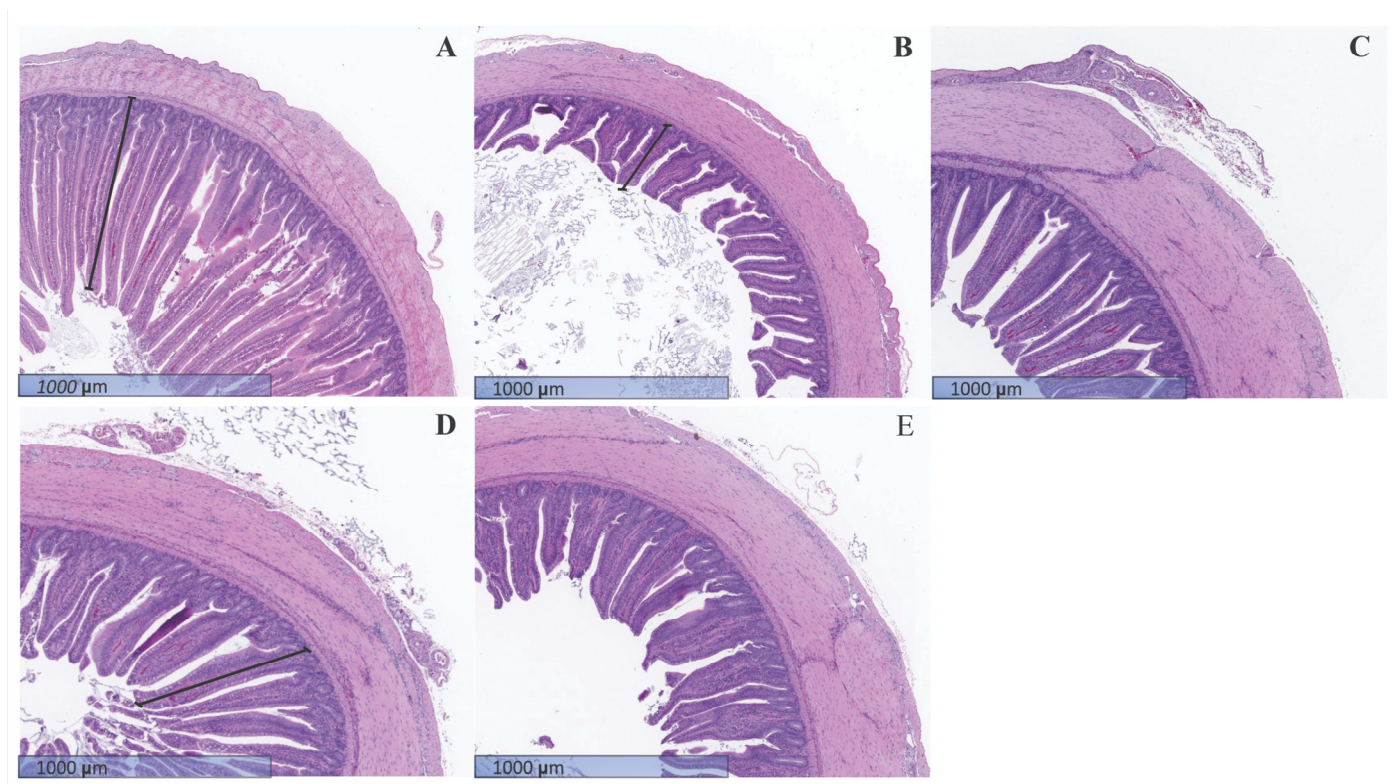

Figure S1. Effect of humic acids on intestinal morphometric analysis in turkeys consuming a maize–soybean-based diet contaminated with 250 ng AFB/g feed for 28 days. Histological images were taken using a 2.4 × objective on H&E-stained tissue sections. (A) negative control; (B) positive control; (C) HA; (D) HA + AFB<sub>1</sub>; (E) ZEO + AFB<sub>1</sub>. The black bar shows a representative villi average.
